# Supplementary material for: Dual-AIEgens in one organoplatinum(ii) metallaprism: photoluminescence exploration
Source: Royal Society of Chemistry journal article supplement (doi:10.1039/d1dt03919a), 2021-12-18
Supplement: d1dt03919a1.pdf [file d1dt03919a1.pdf]

## Supporting Information

### Dual-AIEgens in One Organoplatinum(II) Metallaprism: Photoluminescence Exploration

Ming-Jie Yan, Sheng-Li Huang\* and Guo-Yu Yang\*

School of Chemistry and Chemical Engineering, Beijing Institute of Technology, Beijing 100081, China

#### Table of Contents

|                                                                                                                                                                                                 |    |
|-------------------------------------------------------------------------------------------------------------------------------------------------------------------------------------------------|----|
| Table of Contents .....                                                                                                                                                                         | 1  |
| Experimental Procedures .....                                                                                                                                                                   | 2  |
| 1. Materials and methods .....                                                                                                                                                                  | 2  |
| 2. Synthesis and characterization of complexes .....                                                                                                                                            | 2  |
| 2.1 Synthesis of {[Pt(dpy)] <sub>2</sub> (Bpy)} .....                                                                                                                                           | 2  |
| 2.2 Synthesis of {[Pt(dpy)] <sub>2</sub> (Bpe)} .....                                                                                                                                           | 2  |
| 2.3 Synthesis of {[Pt(dpy)] <sub>4</sub> (TPPE)} .....                                                                                                                                          | 2  |
| 2.4 Synthesis of { <i>cis</i> -[(Pt-Hdpy) <sub>8</sub> (Bpy) <sub>4</sub> (TPPE) <sub>2</sub> ](OTf) <sub>8</sub> } ( <i>cis</i> - <b>1</b> ) .....                                             | 3  |
| 2.5 Synthesis of { <i>trans</i> -[(Pt-Hdpy) <sub>8</sub> (TPPE) <sub>2</sub> (Bpy) <sub>4</sub> ](OTf) <sub>8</sub> } ( <i>trans</i> - <b>1</b> ) .....                                         | 3  |
| 2.6 Synthesis of { <i>cis</i> -[(Pt-Hdpy) <sub>8</sub> (Bpe) <sub>4</sub> (TPPE) <sub>2</sub> ](OTf) <sub>8</sub> } ( <i>cis</i> - <b>2</b> ) .....                                             | 4  |
| 2.7 Synthesis of { <i>trans</i> -[(Pt-Hdpy) <sub>8</sub> (TPPE) <sub>2</sub> (Bpe) <sub>4</sub> ](OTf) <sub>8</sub> } ( <i>trans</i> - <b>2</b> ) .....                                         | 5  |
| 3. <sup>1</sup> H NMR and 2D COSY spectra .....                                                                                                                                                 | 5  |
| 4. ESI-MS spectra of <i>cis</i> - <b>2</b> and <i>trans</i> - <b>2</b> .....                                                                                                                    | 9  |
| 5. IR spectra of <i>cis</i> - <b>1</b> , <i>trans</i> - <b>1</b> , <i>cis</i> - <b>2</b> and <i>trans</i> - <b>2</b> .....                                                                      | 10 |
| 6. Absorption spectra of ligands and complexes .....                                                                                                                                            | 10 |
| 7. The photoluminescence (PL) emission spectra, Fluorescence quantum yield (Φ <sub>F</sub> ) and lifetime (τ) .....                                                                             | 12 |
| 8. The scanning electron microscopy (SEM) of <i>cis</i> - <b>1</b> and <i>cis</i> - <b>2</b> nanostructures .....                                                                               | 14 |
| 9. The photoluminescence (PL) emission spectra and CIE coordinate diagram of <i>cis</i> - <b>2</b> and <i>trans</i> - <b>2</b> in CH <sub>2</sub> Cl <sub>2</sub> at various temperatures ..... | 15 |
| References .....                                                                                                                                                                                | 16 |

## Experimental Procedures

### 1. Materials and methods

The  $[\text{Pt}(\text{dpy})(\text{dms})]$  ( $\text{H}_2\text{dpy}$  = 2,6-diphenylpyridine,  $\text{dms}$  = dimethylsulfoxide) were prepared according to the reported procedures.<sup>1</sup> All other reagents (4,4'-bipyridine, Bpy; 1,2-bis(4-pyridyl)ethyne, Bpe; 1,1,2,2-tetrakis(4-(pyridin-4-yl)phenyl)ethane, TPPE, etc) were commercially available and used as received. All reactions and manipulations were performed under a nitrogen atmosphere, using standard Schlenk techniques.  $^1\text{H}$  NMR spectra were recorded on a Bruker Avance III HD 400 spectrometer using the residual protonated solvent as internal standard. Infrared spectra were recorded on IRAffinity-1S spectrometer (IRAffinity-1S). UV-vis spectra were recorded on TU-1901 spectrophotometer. The photoluminescence (PL) spectra were performed on a Hitachi F-7000 spectrophotometer equipped with a 150W xenon lamp as the excitation source at room temperature. The fluorescence spectra at various temperatures were recorded on an Edinburgh Instruments FLS980 spectrophotometer. ESI-MS spectra were recorded on Agilent Q-TOF 6520 mass spectrometer.

### 2. Synthesis and characterization of complexes

#### 2.1 Synthesis of $\{[\text{Pt}(\text{dpy})]_2(\text{Bpy})\}$

A mixture of  $[\text{Pt}(\text{dpy})(\text{dms})]$  (1.0 mmol, 503 mg) and Bpy (0.5 mmol, 78.0 mg) were dissolved in 15 ml dry dichloromethane and stirred at room temperature for 12 h. Gradually, orange solids precipitated from solution. These solids were subsequently collected by filtration and then washed with 10 mL ethyl ether to give orange solids. Yield: 456mg, 90%;  $^1\text{H}$  NMR (400 MHz,  $\text{DMSO}-d_6$ , 298 K)  $\delta$  (ppm): 8.73 (d,  $J$  = 4 Hz, 4H,  $\text{H}_b$ ), 7.84 (m, 6H,  $\text{H}_{a+h}$ ), 7.78 (d,  $J$  = 8 Hz, 4H,  $\text{H}_c$ ), 7.66-7.63 (m, 8H,  $\text{H}_{f+g}$ ), 7.22 (t,  $J$  = 8 Hz, 4H,  $\text{H}_d$ ), 7.10 (t,  $J$  = 4 Hz, 4H,  $\text{H}_e$ ).

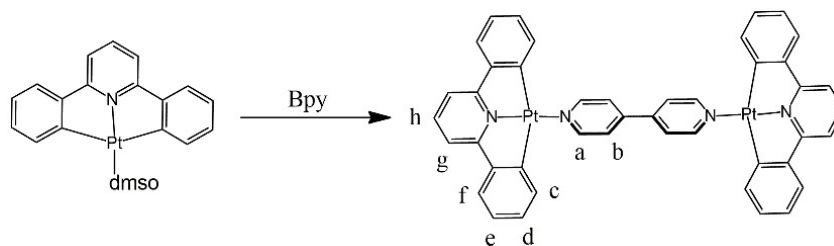

Fig S1. Synthesis of  $\{[\text{Pt}(\text{dpy})]_2(\text{Bpy})\}$ .

#### 2.2 Synthesis of $\{[\text{Pt}(\text{dpy})]_2(\text{Bpe})\}$

A mixture of  $[\text{Pt}(\text{dpy})(\text{dms})]$  (1.0 mmol, 503 mg) and Bpe (0.5 mmol, 90.0 mg) were dissolved in 15 ml dry dichloromethane and stirred at room temperature for 12 h. The solvent was removed under vacuum and then these solids were washed with 10 mL ethyl ether to give red solids. Yield: 471mg, 92%;  $^1\text{H}$  NMR (400 MHz,  $\text{CDCl}_3$ , 298 K)  $\delta$  (ppm): 9.16 (d,  $J$  = 8 Hz, 4H,  $\text{H}_b$ ), 7.58 (m, 6H,  $\text{H}_{a+h}$ ), 7.53 (d,  $J$  = 4 Hz, 4H,  $\text{H}_c$ ), 7.49-7.47 (m, 8H,  $\text{H}_{f+g}$ ), 7.11 (t,  $J$  = 8 Hz, 4H,  $\text{H}_d$ ), 7.00 (t,  $J$  = 12 Hz, 4H,  $\text{H}_e$ ).

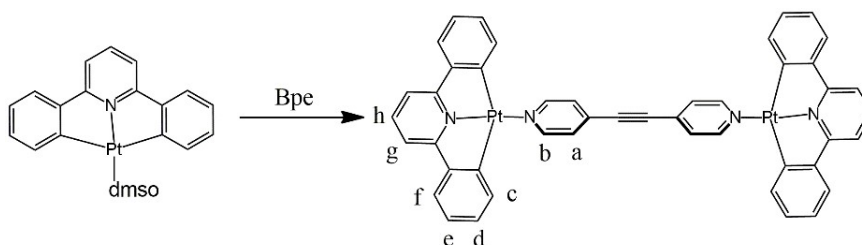

Fig S2. Synthesis of  $\{[\text{Pt}(\text{dpy})]_2(\text{Bpe})\}$ .

#### 2.3 Synthesis of $\{[\text{Pt}(\text{dpy})]_4(\text{TPPE})\}$

The  $\{[\text{Pt}(\text{dpy})]_4(\text{TPPE})\}$  was synthesized in a procedure analogous to that of  $\{[\text{Pt}(\text{dpy})]_2(\text{Bpy})\}$  except that Bpy was took the place of TPPE (0.25 mmol, 160.1 mg). The yellow solids were obtained. Yield: 539 mg, 92%;  $^1\text{H}$  NMR (400 MHz,  $\text{DMSO}-d_6$ , 298 K)  $\delta$  (ppm): 8.59 (d,  $J$  = 4 Hz, 8H,  $\text{H}_b$ ), 7.86 (t,  $J$  = 8 Hz, 4H,  $\text{H}_h$ ), 7.76 (d,  $J$  = 20 Hz, 8H,  $\text{H}_f$ ), 7.69

(d, J = 4 Hz, 8H, H<sub>a</sub>), 7.67 (d, J = 4 Hz, 8H, H<sub>i</sub>), 7.65-7.63 (m, 16H, H<sub>c+g</sub>), 7.24-7.18 (m, 16H, H<sub>d+j</sub>), 7.10 (t, J = 4 Hz, 8H, H<sub>e</sub>).

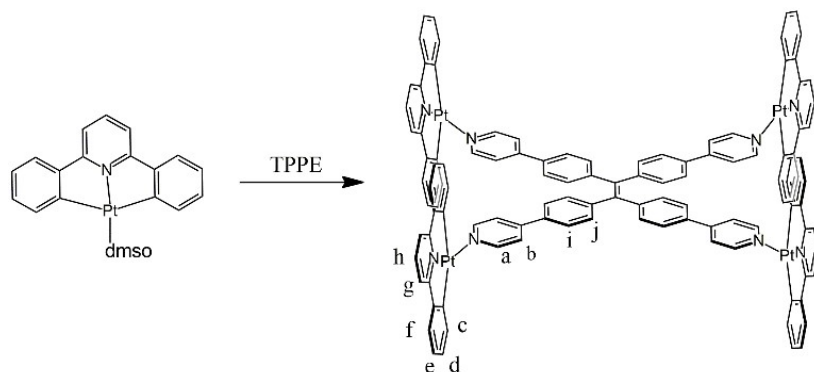

Fig S3. Synthesis of  $\{[\text{Pt}(\text{dpy})]_4(\text{TPPE})\}$ .

#### 2.4 Synthesis of $\{cis-[(\text{Pt-Hdpy})_8(\text{Bpy})_4(\text{TPPE})_2](\text{OTf})_8\}$ (*cis-1*)

$[\text{Pt}(\text{dpy})(\text{dmsO})]$  (1.0 mmol, 503 mg) and Bpy (0.5 mmol, 78.0 mg) was dissolved in 15 ml dry dichloromethane and stirred at room temperature for 6 h. Followed by the addition of camphorsulfonic acid (1.0 mmol, 234 mg), the solution became clear. 30 minutes later, TPPE (0.25 mmol, 160 mg) was added and the solution was stirred at room temperature for 12h, the solvents was concentrated to about 5 ml. 3 ml DCM solution of Tetrabutylammonium Triflate (3.0 mmol, 1.18 g) was added and stirred at room temperature for 3 h, Then, diethyl ether was added, giving *cis-1* as yellow solid. Yield: 650 mg, 80%; IR spectrum ( $\nu$ ,  $\text{cm}^{-1}$ ):  $\nu = 3059$  (w), 2357 (w), 2314 (w), 1608 (s), 1558 (m), 1473 (m), 1438 (s), 1419 (m), 1253 (s), 1219 (s), 1153 (s), 1064 (m), 1029 (s), 813 (s), 759 (s), 694 (m), 636 (s), 570 (m), 516 (s)  $\text{cm}^{-1}$ .  $^1\text{H}$  NMR (400 MHz,  $\text{CD}_2\text{Cl}_2$ , 298 K)  $\delta$  (ppm): 8.90 (d, J = 8 Hz, 16H, H<sub>c</sub>), 8.08 (t, J = 8 Hz, 8H, H<sub>g</sub>), 7.97 (s, 8 H, H<sub>f</sub>), 7.94 (d, J = 4 Hz, 16H, H<sub>k+b</sub>), 7.80 (d, J = 8 Hz, 16H, H<sub>d</sub>), 7.73 (d, J = 8 Hz, 8H, H<sub>e</sub>), 7.48 (d, J = 8 Hz, 16H, H<sub>a</sub>), 7.33 (d, J = 8 Hz, 16H, H<sub>o</sub>), 7.29 (s, 8 H, H<sub>k</sub>), 7.26-7.22 (m, 32H, H<sub>n+o</sub>), 7.19 (d, J = 8 Hz, 16H, H<sub>i</sub>), 7.12 (d, J = 8 Hz, 16H, H<sub>m</sub>), 7.08 (t, J = 8 Hz, 8H, H<sub>j</sub>), 6.51 (d, J = 8 Hz, 8H, H<sub>l</sub>). ESI-MS: 2018.02 [*cis-1* – 5OTf]<sup>3+</sup>.

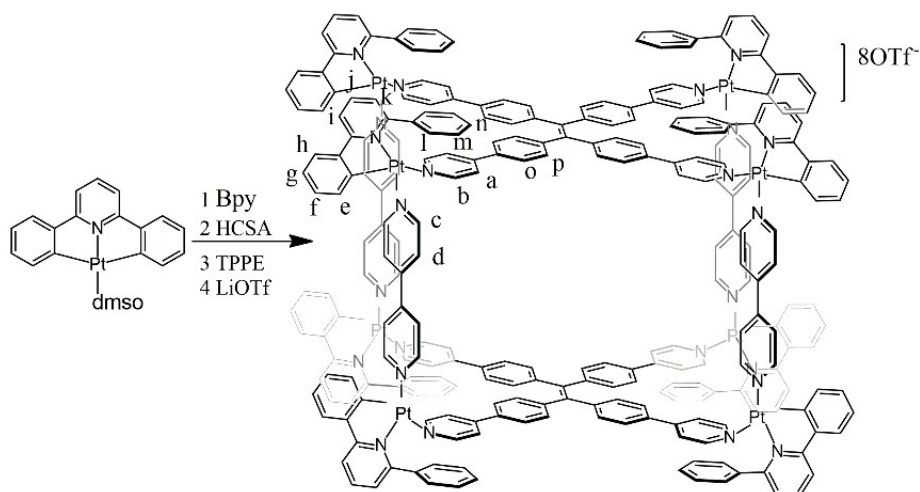

Fig S4. Synthesis of *cis-1*.

#### 2.5 Synthesis of $\{trans-[(\text{Pt-Hdpy})_8(\text{TPPE})_2(\text{Bpy})_4](\text{OTf})_8\}$ (*trans-1*)

$[\text{Pt}(\text{dpy})(\text{dmsO})]$  (1.0 mmol, 503 mg) and TPPE (0.25 mmol, 160 mg) was dissolved in 15 ml dry dichloromethane and stirred at room temperature for 6 h. Followed by the addition of camphorsulfonic acid (1.0 mmol, 234 mg), the solution became clear. 30 minutes later, Bpy (0.5 mmol, 78.0 mg) was added and the solution was stirred at room temperature for 12h, the solvents was concentrated to about 5 ml. 3 ml DCM solution of Tetrabutylammonium Triflate (3.0 mmol, 1.18 g) was added and stirred at room temperature for 3 h, Then, diethyl ether was added, giving *trans-1* as yellow solid. Yield: 666 mg, 82%; IR spectrum ( $\nu$ ,  $\text{cm}^{-1}$ ):  $\nu = 3059$  (w), 2349 (w), 2310 (w), 1604 (s), 1558 (m), 1473 (m), 1438 (s), 1411 (m), 1253 (s), 1222 (s), 1145 (s), 1064 (m), 1029 (s), 813 (s), 759 (s), 698 (s), 636 (s), 570 (m), 516 (s)  $\text{cm}^{-1}$ .  $^1\text{H}$  NMR (400 MHz,  $\text{CD}_2\text{Cl}_2$ , 298 K)  $\delta$  (ppm): 8.67 (d, J = 8 Hz, 16H, H<sub>b</sub>),

8.12 (d,  $J = 8$  Hz, 16H,  $H_c$ ), 8.06 (t,  $J = 8$  Hz, 8H,  $H_g$ ), 7.95 (d,  $J = 8$  Hz, 8H,  $H_k$ ), 7.70 (d,  $J = 8$  Hz, 8H,  $H_e$ ), 7.53 (d,  $J = 8$  Hz, 16H,  $H_d$ ), 7.49 (d,  $J = 4$  Hz, 16H,  $H_a$ ), 7.39 (d,  $J = 8$  Hz, 16H,  $H_o$ ), 7.32-7.28 (m, 32H,  $H_{l+m}$ ), 7.26 (d,  $J = 8$  Hz, 8H,  $H_f$ ), 7.23 (t,  $J = 8$  Hz, 16H,  $H_{n+h}$ ), 7.12 (d,  $J = 8$  Hz, 16H,  $H_p$ ), 7.03 (t,  $J = 8$  Hz, 8H,  $H_j$ ), 6.45 (d,  $J = 8$  Hz, 8H,  $H_i$ ). ESI-MS: 934.53  $[(trans-1) - 2OTf]^6+$ .

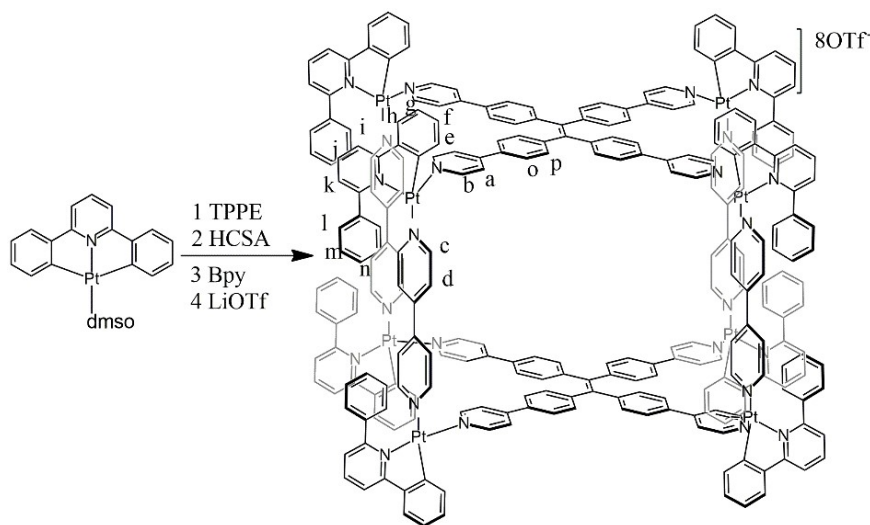

Fig S5. Synthesis of *trans*-1.

## 2.6 Synthesis of $\{cis-[(Pt-Hdpy)_8(Bpe)_4(TPPE)_2](OTf)_8\}$ (*cis*-2)

$[Pt(dpy)(dmsO)]$  (1.0 mmol, 503 mg) and Bpe (0.5 mmol, 90.0 mg) was dissolved in 15 ml dry dichloromethane and stirred at room temperature for 6 h. The camphorsulfonic acid (1.0 mmol, 234 mg) was added, 30 minutes later, TPPE (0.25 mmol, 160 mg) was added and the solution was stirred at room temperature for 12h, the solvents was concentrated to about 5 ml. 3 ml DCM solution of Tetrabutylammonium Triflate (3.0 mmol, 1.18 g) was added and stirred at room temperature for 3 h. Then, diethyl ether was added, giving *cis*-2 as yellow solid. Yield: 617 mg, 75%; IR spectrum ( $\nu$ ,  $cm^{-1}$ ):  $\nu = 3051$  (w), 2376 (w), 2353 (w), 2322 (w), 1608 (s), 1554 (m), 1473 (m), 1438 (s), 1257 (s), 1219 (s), 1145 (s), 1064 (m), 1029 (s), 821 (s), 756 (s), 698 (s), 632 (s), 574 (m), 547 (m), 513 (s)  $cm^{-1}$ .  $^1H$  NMR (400 MHz,  $CD_2Cl_2$ , 298 K)  $\delta$  (ppm): 8.80 (d,  $J = 8$  Hz, 16H,  $H_c$ ), 8.05 (t,  $J = 8$  Hz, 8H,  $H_g$ ), 7.93 (d,  $J = 8$  Hz, 8H,  $H_k$ ), 7.88 (d,  $J = 4$  Hz, 16H,  $H_b$ ), 7.70 (d,  $J = 8$  Hz, 8H,  $H_n$ ), 7.48 (d,  $J = 8$  Hz, 16H,  $H_p$ ), 7.44 (d,  $J = 8$  Hz, 16H,  $H_d$ ), 7.37 (d,  $J = 8$  Hz, 16H,  $H_{e+f}$ ), 7.26-7.24 (m, 32H,  $H_{a+o}$ ), 7.23 - 7.21 (d,  $J = 8$  Hz, 16H,  $H_m$ ), 7.19 (d,  $J = 4$  Hz, 16H,  $H_l$ ), 7.17 (d,  $J = 4$  Hz, 8H,  $H_n$ ), 7.09 (t,  $J = 4$  Hz, 8H,  $H_j$ ), 6.58 (d,  $J = 8$  Hz, 8H,  $H_i$ ). ESI-MS: 2050.01  $[(cis-2) - 5OTf]^3+$ .

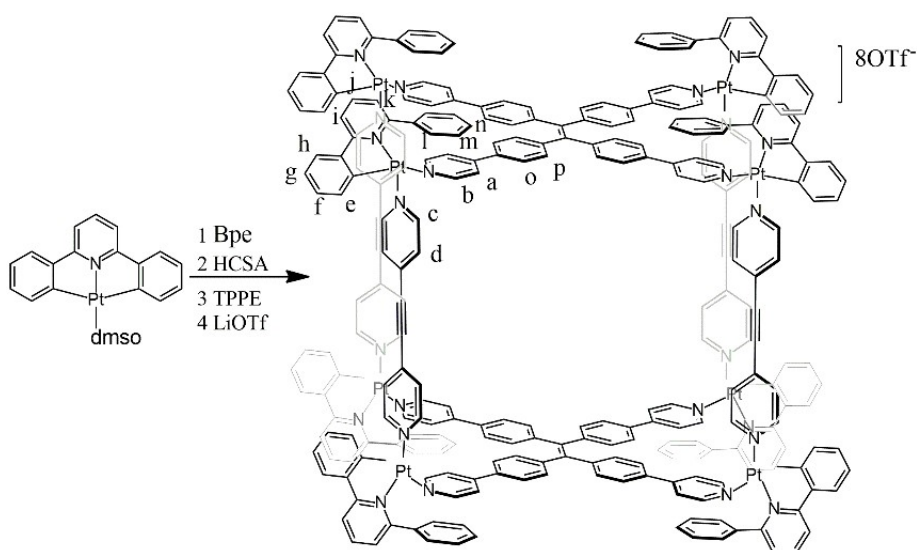

Fig S6. Synthesis of *cis*-2.

## 2.7 Synthesis of $\{trans-[(Pt-Hdpy)_8(TPPE)_2(Bpe)_4](OTf)_8\}$ (*trans-2*)

$[Pt(dpy)(dmsO)]$  (1.0 mmol, 503 mg) and Bpe (0.5 mmol, 90.0 mg) was dissolved in 15 ml dry dichloromethane and stirred at room temperature for 6 h. The camphorsulfonic acid (1.0 mmol, 234 mg) was added, 30 minutes later, TPPE (0.25 mmol, 160 mg) was added and the solution was stirred at room temperature for 12h, the solvents was concentrated to about 5 ml. 3 ml DCM solution of Tetrabutylammonium Triflate (3.0 mmol, 1.18 g) was added and stirred at room temperature for 3 h, Then, diethyl ether was added, giving *cis-2* as yellow solid. Yield: 617 mg, 75%; IR spectrum ( $\nu$ ,  $cm^{-1}$ ):  $\nu = 3051$  (w), 2376 (w), 2353 (w), 2322 (w), 1608 (s), 1554 (m), 1473 (m), 1438 (s), 1257 (s), 1219 (s), 1145 (s), 1064 (m), 1029 (s), 821 (s), 756 (s), 698 (s), 632 (s), 574 (m), 547 (m), 513 (s)  $cm^{-1}$ .  $^1H$  NMR (400 MHz,  $CD_2Cl_2$ , 298 K)  $\delta$  (ppm): 8.80 (d,  $J = 8$  Hz, 16H,  $H_b$ ), 8.05 (t,  $J = 8$  Hz, 8H,  $H_g$ ), 7.93 (d,  $J = 8$  Hz, 8H,  $H_k$ ), 7.88 (d,  $J = 4$  Hz, 16H,  $H_c$ ), 7.70 (d,  $J = 8$  Hz, 8H,  $H_n$ ), 7.48 (d,  $J = 8$  Hz, 16H,  $H_a$ ), 7.44 (d,  $J = 8$  Hz, 16H,  $H_p$ ), 7.37 (d,  $J = 8$  Hz, 16H,  $H_{e+f}$ ), 7.26 (d,  $J = 4$  Hz,  $H_o$ ), 7.24 (d,  $J = 4$  Hz, 16H,  $H_d$ ), 7.23 (d,  $J = 4$  Hz, 16H,  $H_l$ ), 7.19 (d,  $J = 4$  Hz, 16H,  $H_m$ ), 7.17 (d,  $J = 4$  Hz, 8H,  $H_n$ ), 7.09 (t,  $J = 4$  Hz, 8H,  $H_j$ ), 6.58 (d,  $J = 8$  Hz, 8H,  $H_i$ ). ESI-MS: 2050.01 [*(cis-2)* – 5OTf] $^{3+}$ .

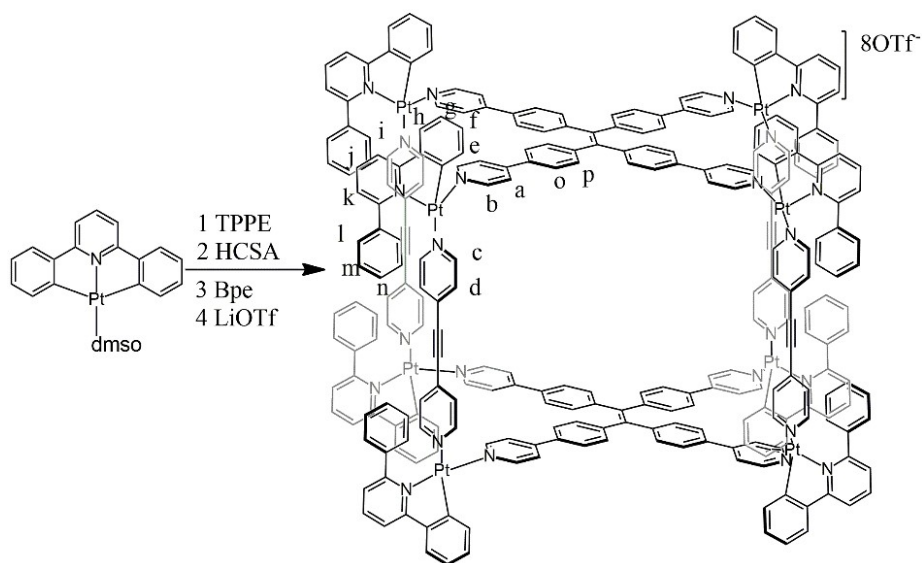

Fig S7. Synthesis of *trans-2*.

## 3. $^1H$ NMR and 2D COSY spectra

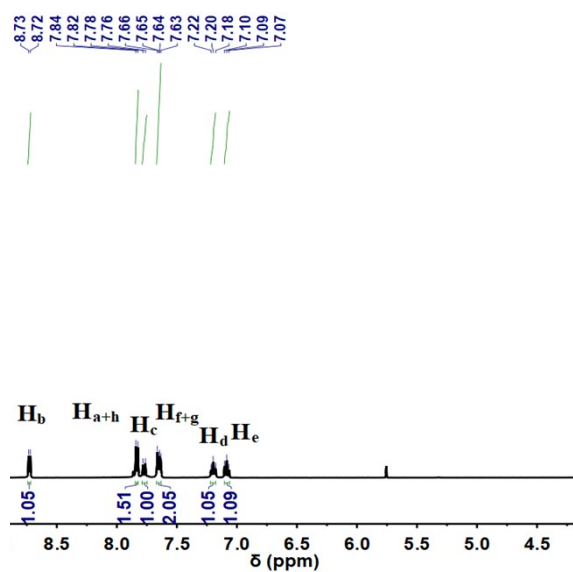

Fig S8.  $^1H$  NMR spectra (400 MHz,  $DMSO-d_6$ , 298 K, TMS as an external standard) of  $\{[Pt(Hdpy)]_2(Bpy)\}$ .

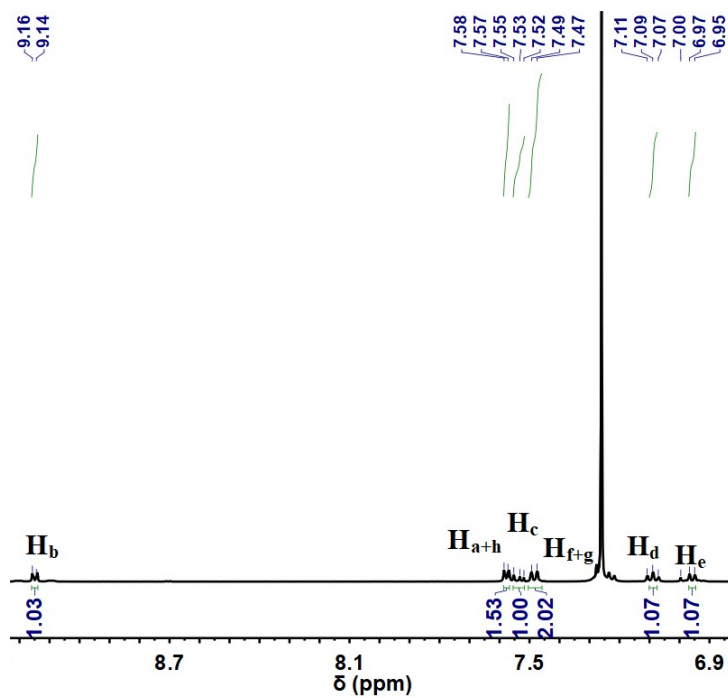

**Fig S9.**  $^1\text{H}$  NMR spectra (400 MHz,  $\text{CDCl}_3$ , 298 K, TMS as an external standard) of  $\{[\text{Pt}(\text{Hdpy})]_2(\text{Bpe})\}$ .

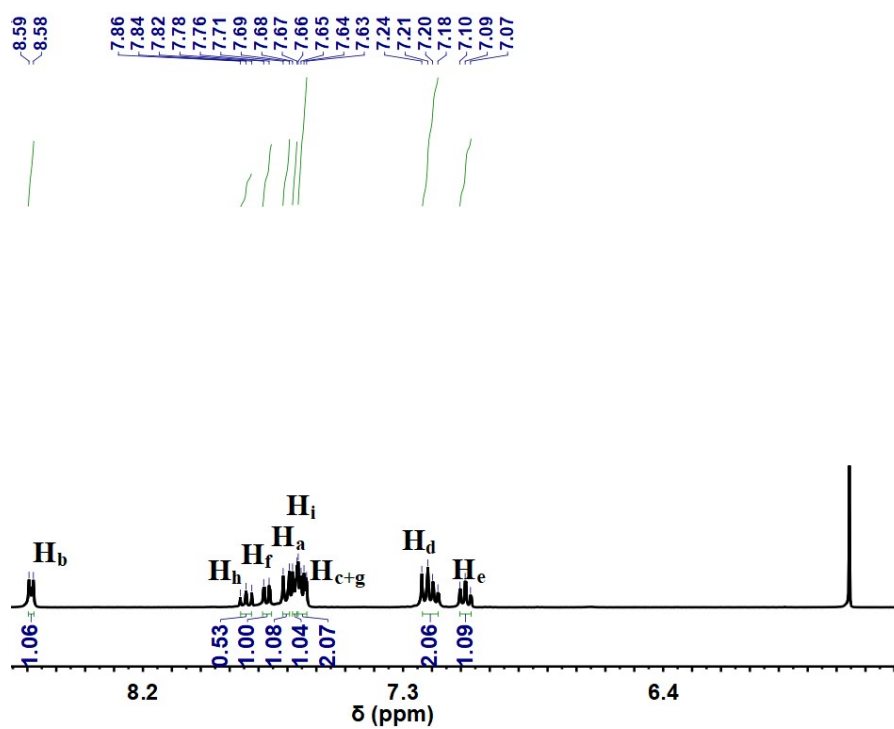

**Fig S10.**  $^1\text{H}$  NMR spectra (400 MHz,  $\text{DMSO}-d_6$ , 298 K, TMS as an external standard) of  $\{[\text{Pt}(\text{Hdpy})]_4(\text{TPPE})\}$ .

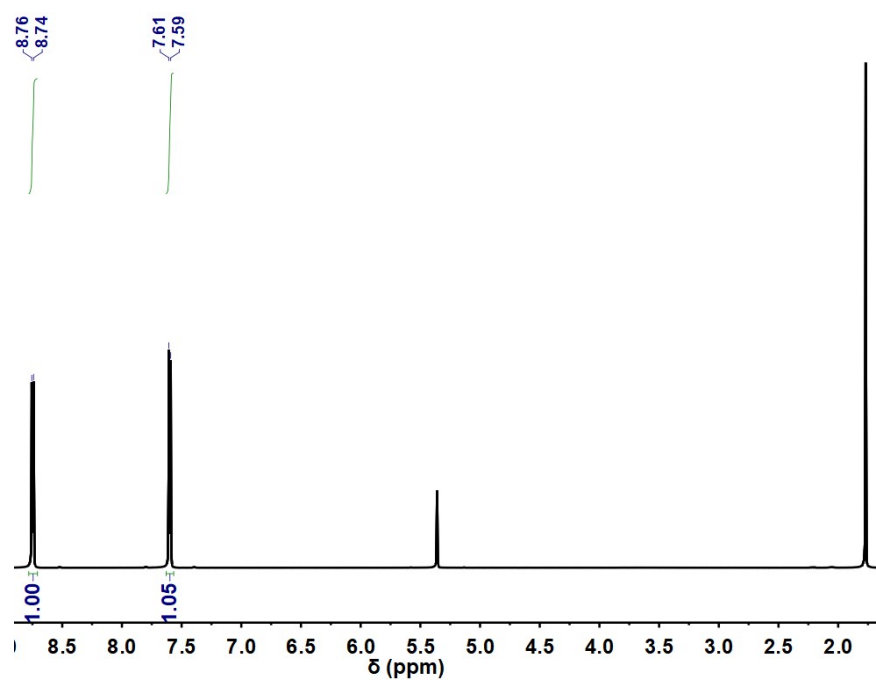

Fig S11. <sup>1</sup>H NMR spectra (400 MHz, CD<sub>2</sub>Cl<sub>2</sub>, 298 K, TMS as an external standard) of Bpy.

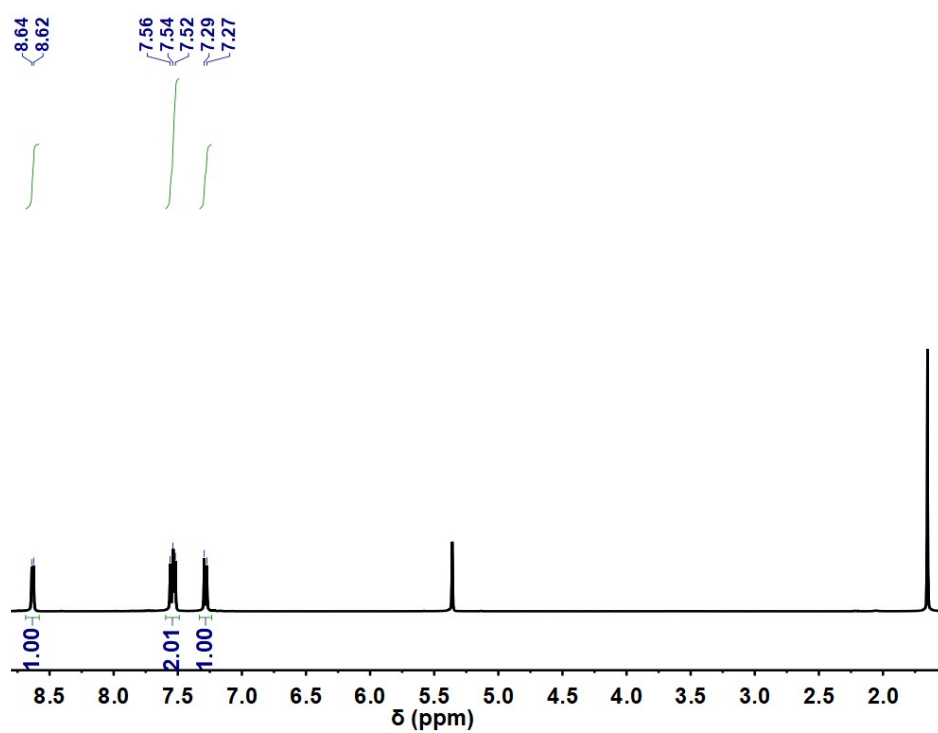

Fig S12. <sup>1</sup>H NMR spectra (400 MHz, CD<sub>2</sub>Cl<sub>2</sub>, 298 K, TMS as an external standard) of TPPE.

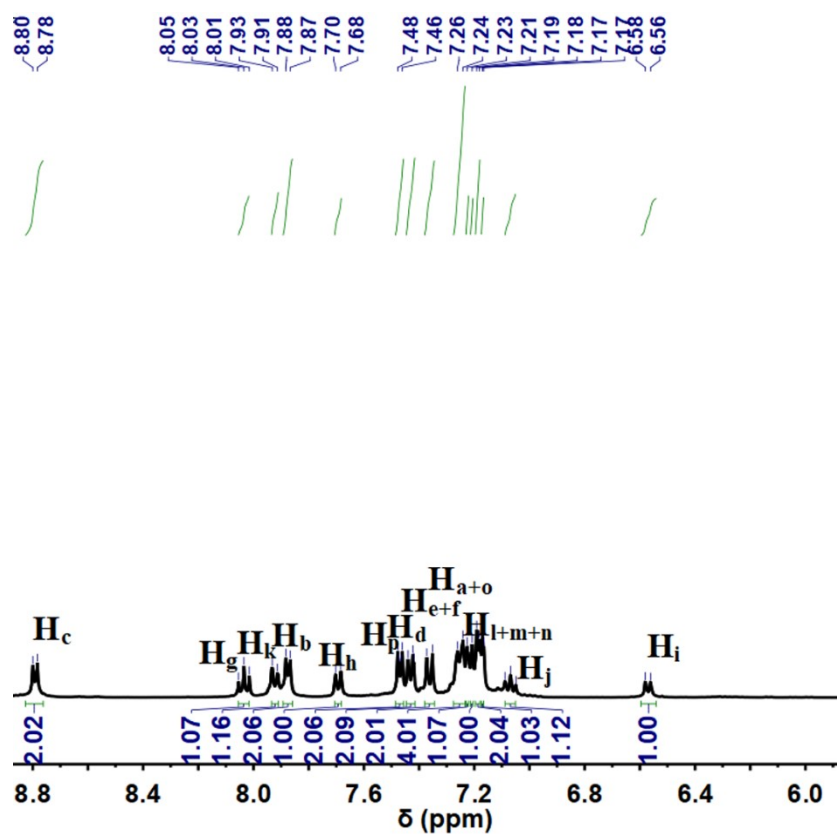

Fig S13. <sup>1</sup>H NMR spectra (400 MHz, DMSO-d<sub>6</sub>, 298 K, TMS as an external standard) of *cis*-2.

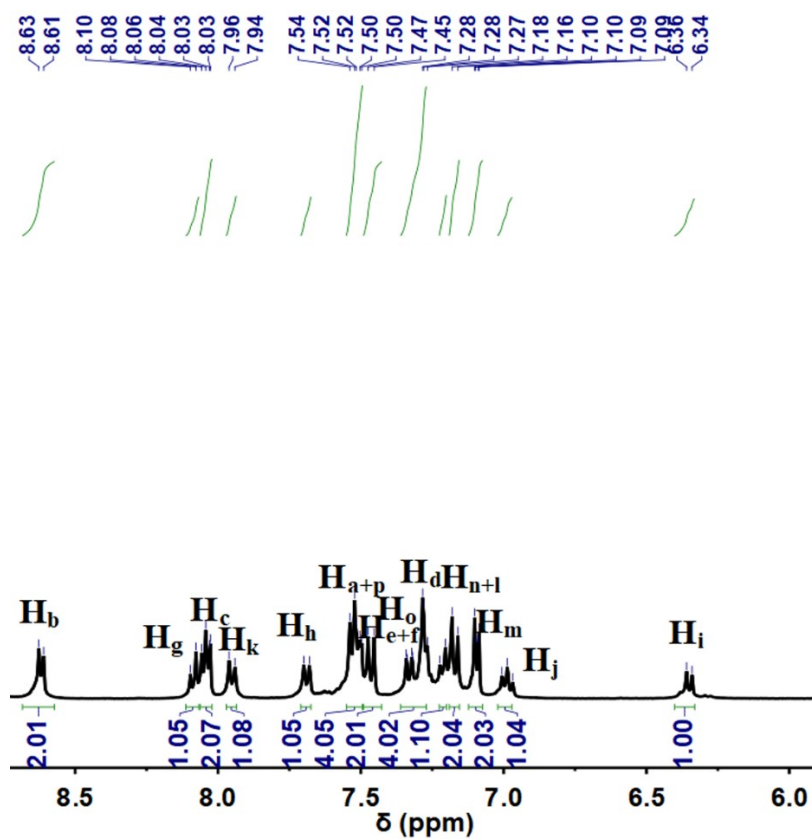

Fig S14. <sup>1</sup>H NMR spectra (400 MHz, DMSO-d<sub>6</sub>, 298 K, TMS as an external standard) of *trans*-2.

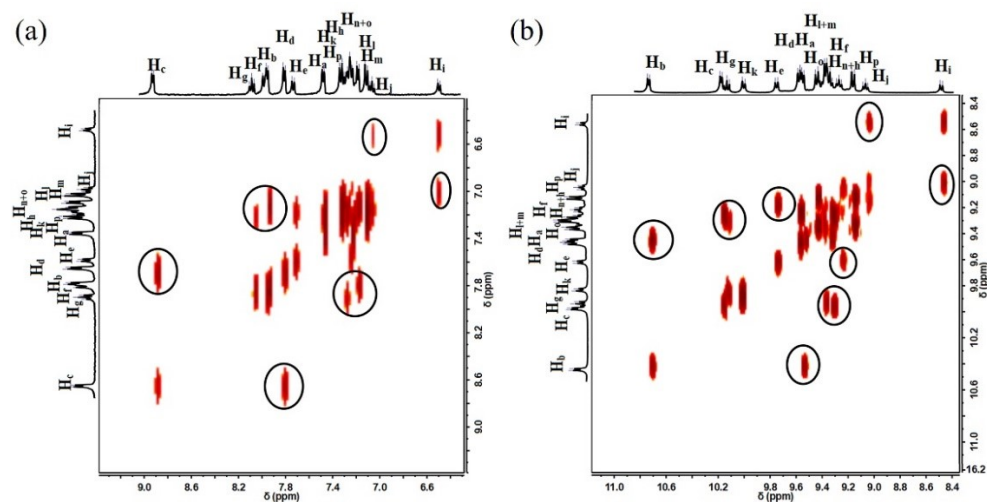

Fig S15. 2D COSY spectra of *cis*-1 (a) and *trans*-1 (b).

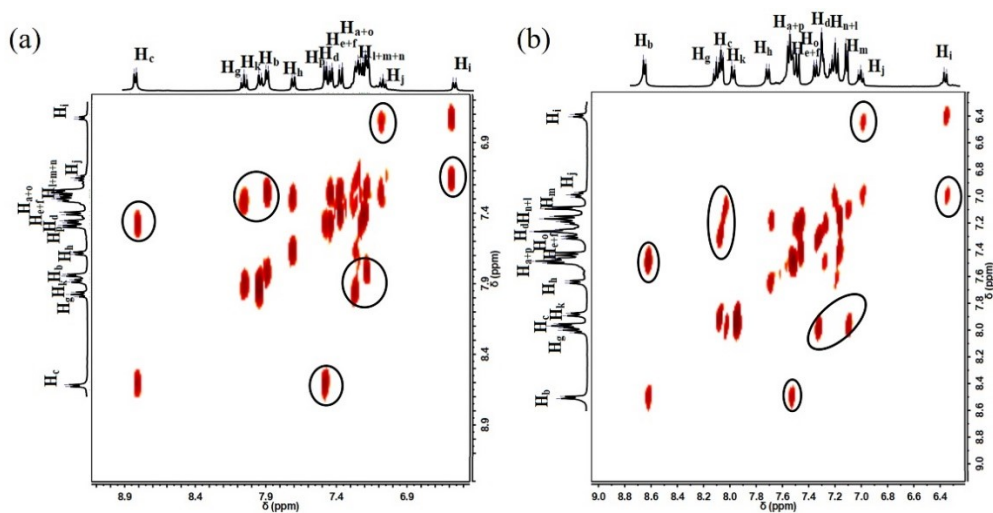

Fig S16. 2D COSY spectra of *cis*-2 (a) and *trans*-2 (b).

#### 4. ESI-MS spectra of *cis*-2 and *trans*-2

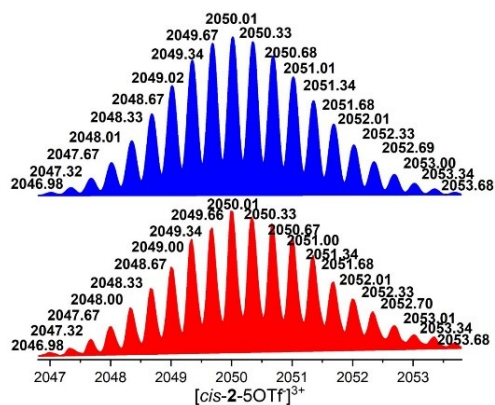

Fig S17. Experimental (below, red) and calculated (above, blue) ESI-MS spectra (3+) of *cis*-2

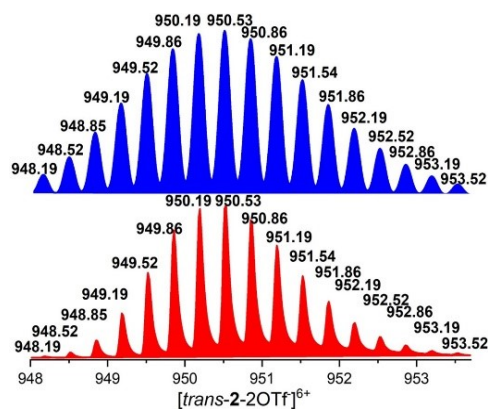

Fig S18. Experimental (below, red) and calculated (above, blue) ESI-MS spectra (6+) of *trans-2*

## 5. IR spectra of *cis-1*, *trans-1*, *cis-2* and *trans-2*

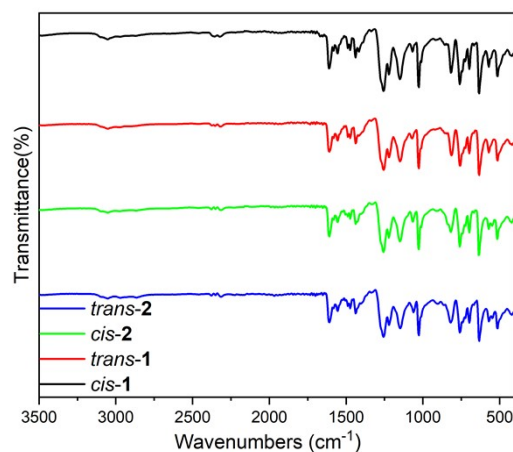

Fig S19. IR spectra of *cis-1*, *trans-1*, *cis-2* and *trans-2*.

## 6. Absorption spectra of ligands and complexes

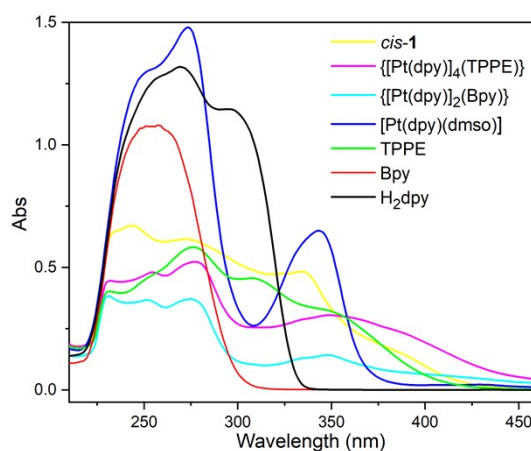

Fig S20. Absorption spectra of *cis-1*,  $\{[Pt(dpy)]_4(TPPE)\}$ ,  $\{[Pt(dpy)]_2(Bpy)\}$ ,  $[Pt(dpy)(dms)]$ , TPPE, Bpy and  $H_2dpy$  in  $CH_2Cl_2$  ( $C = 20.0 \mu M$ ).

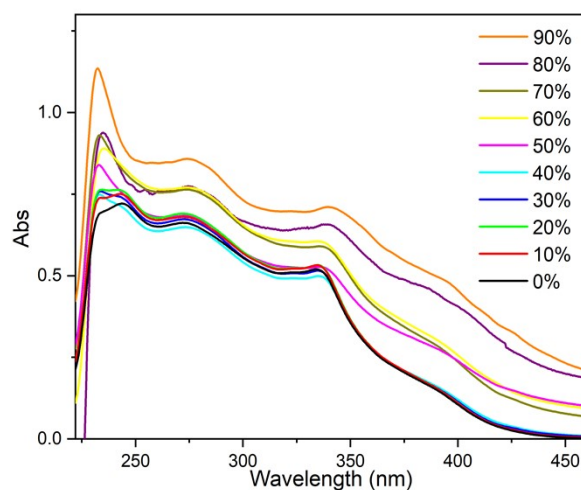

**Fig S21.** Absorption spectra of *cis*-1 versus hexane fraction in  $\text{CH}_2\text{Cl}_2$ /hexane mixtures ( $C = 20.0 \mu\text{M}$ ).

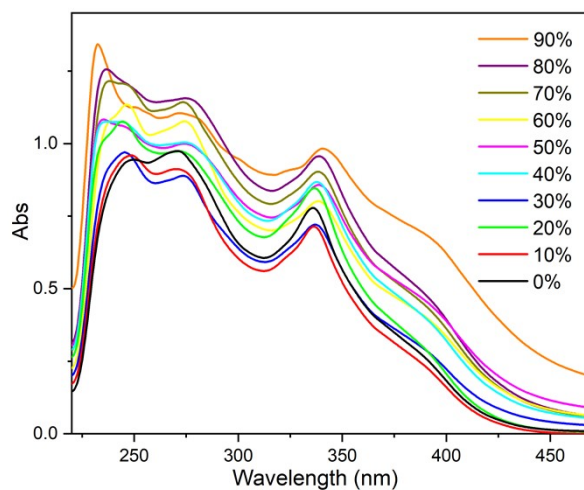

**Fig S22.** Absorption spectra of *trans*-1 versus hexane fraction in  $\text{CH}_2\text{Cl}_2$ /hexane mixtures ( $C = 20.0 \mu\text{M}$ ).

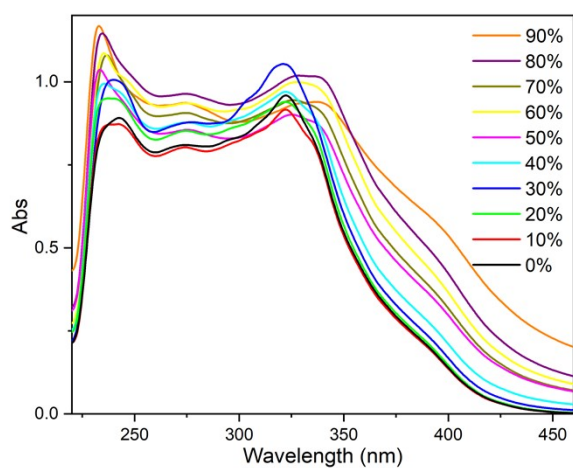

**Fig S23.** Absorption spectra of *cis*-2 versus hexane fraction in  $\text{CH}_2\text{Cl}_2$ /hexane mixtures ( $C = 20.0 \mu\text{M}$ ).

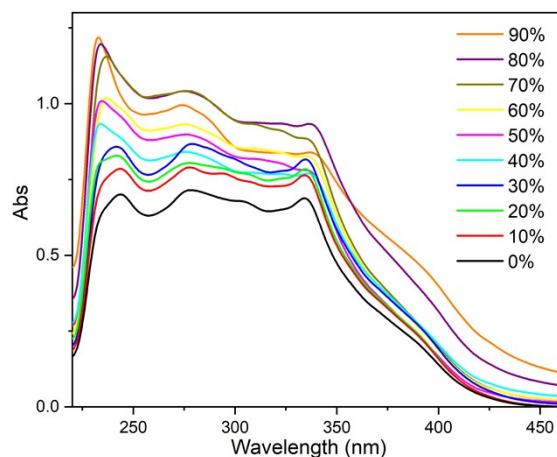

**Fig S24.** Absorption spectra of *trans-2* versus hexane fraction in  $\text{CH}_2\text{Cl}_2$ /hexane mixtures ( $C = 20.0 \mu\text{M}$ ).

## 7. The photoluminescence (PL) emission spectra, Fluorescence quantum yield ( $\Phi_f$ ) and lifetime ( $\tau$ )

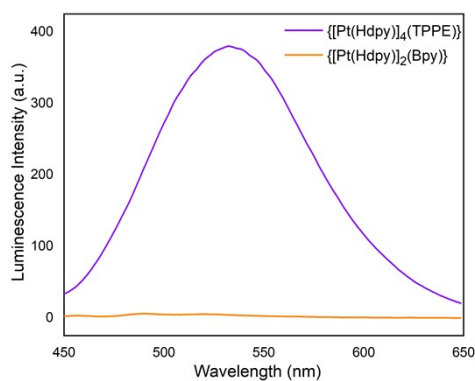

**Fig S25.** Emission spectra of  $[\text{Pt}(\text{Hdpy})_4](\text{TPPE})$  and  $[\text{Pt}(\text{Hdpy})_2](\text{Bpy})$  in  $\text{CH}_2\text{Cl}_2$  ( $C = 20.0 \mu\text{M}$ ).

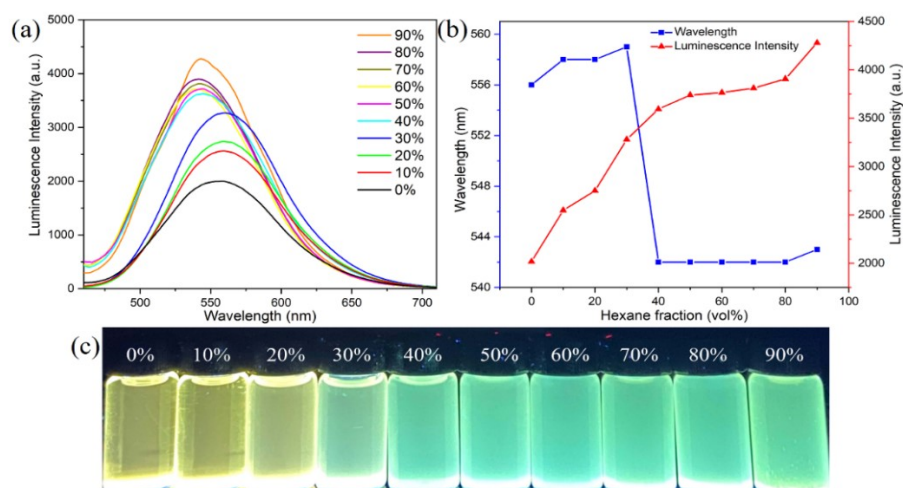

**Fig S26.** Fluorescence emission spectra and plots of maximum emission intensity and wavelength of *trans-1* versus hexane fraction in  $\text{CH}_2\text{Cl}_2$ /hexane mixtures ( $\lambda_{\text{ex}} = 366 \text{ nm}$ ,  $C = 20.0 \mu\text{M}$ ) (a and b); The photographs show the  $\text{CH}_2\text{Cl}_2$  solution of *trans-1* with increasing hexane content from 0% to 90% under 365 nm UV light (c).

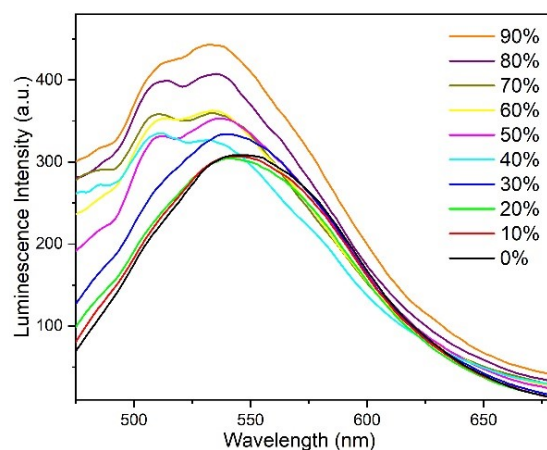

**Fig S27.** Emission spectra of *cis-2* versus hexane fraction in  $\text{CH}_2\text{Cl}_2$ /hexane mixtures ( $\lambda_{\text{ex}} = 366 \text{ nm}$ ,  $C = 20.0 \mu\text{M}$ ).

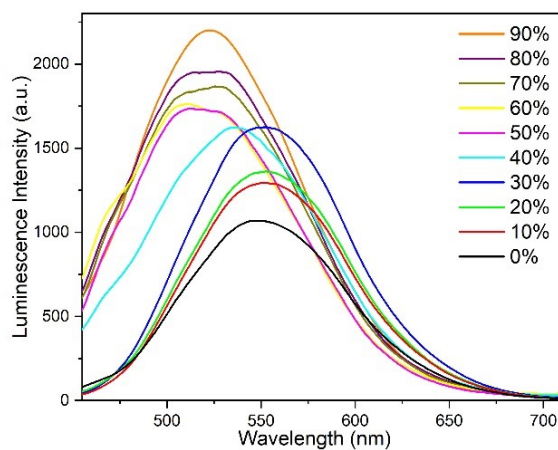

**Fig S28.** Emission spectra of *trans-2* versus hexane fraction in  $\text{CH}_2\text{Cl}_2$ /hexane mixtures ( $\lambda_{\text{ex}} = 366 \text{ nm}$ ,  $C = 20.0 \mu\text{M}$ ).

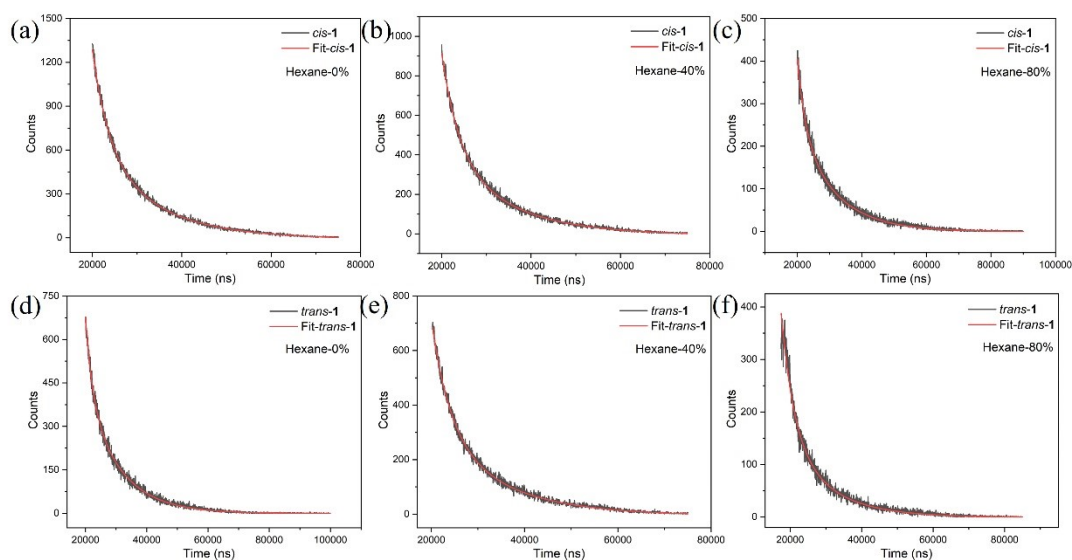

**Fig S29.** Fluorescence lifetime decay traces of *cis-1* (a-c) and *trans-1* (d-f) versus hexane fraction in  $\text{CH}_2\text{Cl}_2$ /hexane mixtures ( $\lambda_{\text{ex}} = 366 \text{ nm}$ ,  $C = 20.0 \mu\text{M}$ ).

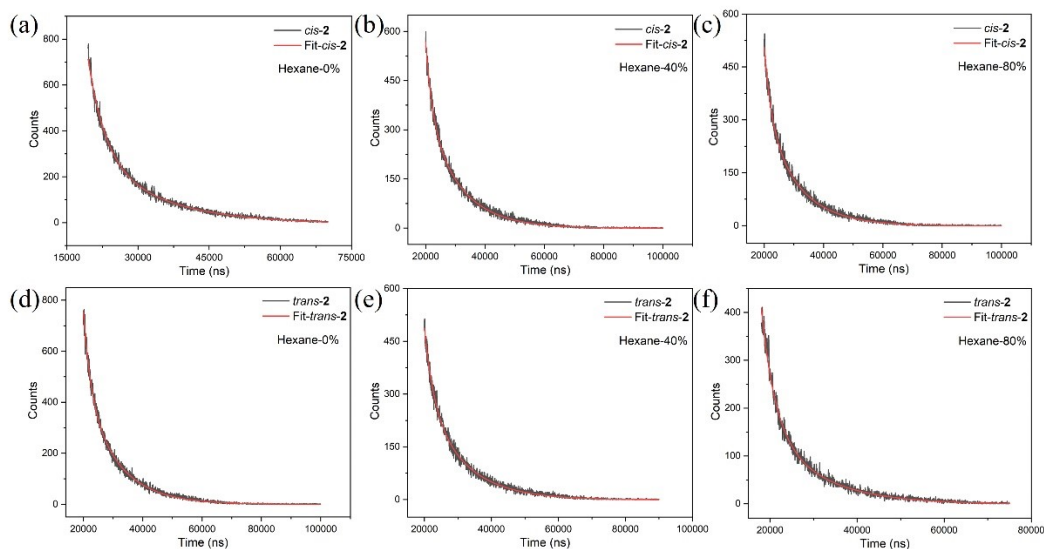

**Fig S30.** Fluorescence lifetime decay traces of *cis-2* (a-c) and *trans-2* (d-f) versus hexane fraction in  $\text{CH}_2\text{Cl}_2$ /hexane mixtures ( $\lambda_{\text{ex}} = 366 \text{ nm}$ ,  $C = 20.0 \mu\text{M}$ ).

Table S1 Fluorescence quantum yield ( $\Phi_F$ ) and lifetime ( $\tau$ ) of complexes in  $\text{CH}_2\text{Cl}_2$ /hexane mixtures.

| sample         | Hexane% | $\Phi_F$ | $\tau_1/\mu\text{s}$ | Rel ( $\tau_1$ )/% | $\tau_2/\mu\text{s}$ | Rel ( $\tau_2$ )/% | $\chi^2$ |
|----------------|---------|----------|----------------------|--------------------|----------------------|--------------------|----------|
| <i>cis-1</i>   | 0       | 0.80     | 3.77                 | 22.74              | 14.00                | 77.26              | 1.07     |
|                | 40      | 1.00     | 3.86                 | 23.62              | 14.57                | 76.38              | 1.07     |
|                | 80      | 1.50     | 2.54                 | 12.28              | 11.59                | 87.72              | 1.02     |
| <i>trans-1</i> | 0       | 1.90     | 2.28                 | 11.01              | 11.07                | 88.99              | 1.01     |
|                | 40      | 2.30     | 4.07                 | 25.49              | 15.00                | 74.51              | 1.09     |
|                | 80      | 2.80     | 3.60                 | 29.48              | 12.32                | 70.52              | 1.01     |
| <i>cis-2</i>   | 0       | 0.40     | 3.60                 | 25.14              | 14.66                | 74.86              | 1.09     |
|                | 40      | 0.70     | 2.30                 | 10.99              | 11.30                | 89.01              | 1.03     |
|                | 80      | 1.30     | 2.37                 | 11.28              | 11.20                | 88.72              | 1.00     |
| <i>trans-2</i> | 0       | 1.20     | 2.52                 | 12.98              | 11.23                | 87.02              | 1.08     |
|                | 40      | 1.60     | 2.87                 | 14.96              | 11.63                | 85.04              | 1.07     |
|                | 80      | 2.20     | 3.15                 | 26.78              | 12.52                | 73.22              | 1.03     |

## 8. The scanning electron microscopy (SEM) of *cis-1* and *cis-2* nanostructures

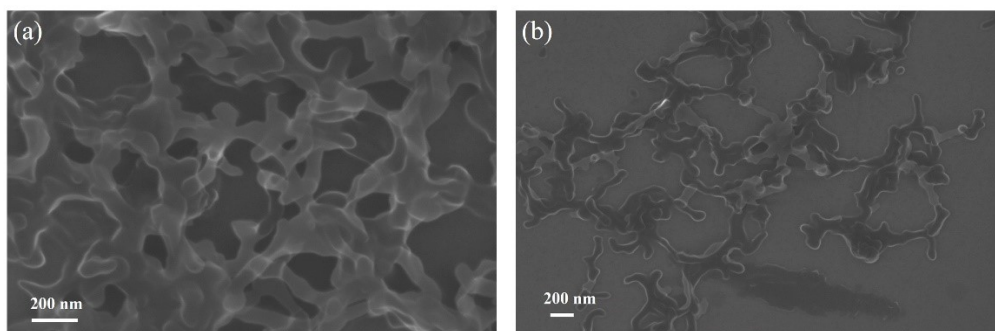

Fig S31. TEM images prepared from a solution of *cis-1* (a) and *cis-2* (b) in 70% hexane/ $\text{CH}_2\text{Cl}_2$  mixture.

**9. The photoluminescence (PL) emission spectra and CIE coordinate diagram of *cis-2* and *trans-2* in  $\text{CH}_2\text{Cl}_2$  at various temperatures**

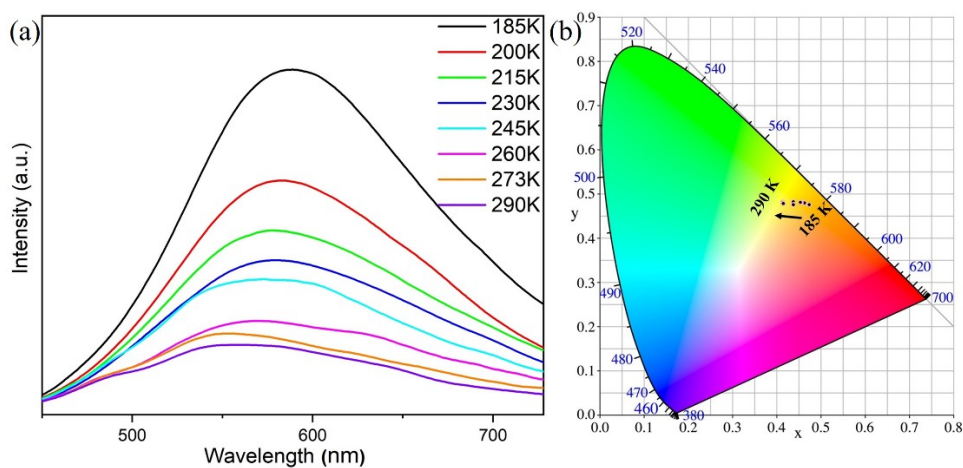

Fig S32. Fluorescence emission spectra (a) and CIE coordinate diagram (b) of *cis-2* in  $\text{CH}_2\text{Cl}_2$  ( $C = 20.0 \mu\text{M}$ ) at various temperatures.

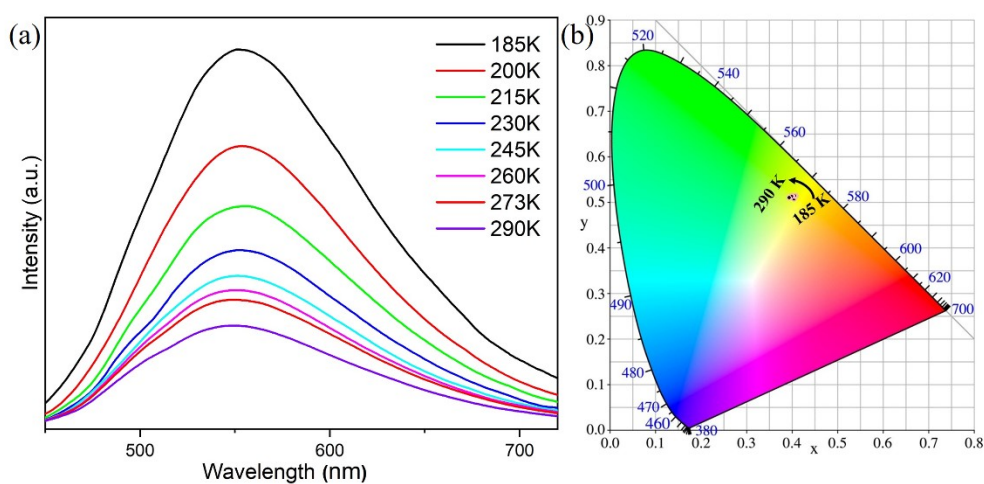

Fig S33. Fluorescence emission spectra (a) and CIE coordinate diagram (b) of *trans-2* in  $\text{CH}_2\text{Cl}_2$  ( $C = 20.0 \mu\text{M}$ ) at various temperatures.

## References

- [1] C. White, A. Yates, P. M. Maitles, *Inorg. Synth.*, 1992, **29**, 228-234.
- [2] J. Bolger, A. Gourdon, E. Ishow, J. P. Launay, *Inorg. Chem.*, 1996, **35**, 2937-2944.
